# Supplementary material
Source: PubMed Central journal article supplement (PMC6680339)
Supplement: FISC-37-345-s001.pdf [file FISC-37-345-s001.pdf]

## Appendix A: Descriptive tables

**Table A.1. Distribution of disabilities**

| <i>Do you have any difficulty with ...</i>                                | % of sample saying yes |                                |                              |       |                                 |                               |
|---------------------------------------------------------------------------|------------------------|--------------------------------|------------------------------|-------|---------------------------------|-------------------------------|
|                                                                           | HRS                    | HRS,<br>moderate<br>disability | HRS,<br>severe<br>disability | ELSA  | ELSA,<br>moderate<br>disability | ELSA,<br>severe<br>disability |
| <b>Activities of daily living (ADLs)</b>                                  |                        |                                |                              |       |                                 |                               |
| Dressing                                                                  | 7.9%                   | 23.6%                          | 47.0%                        | 14.6% | 42.8%                           | 63.8%                         |
| Walking across a room                                                     | 6.2%                   | 19.5%                          | 44.4%                        | 3.8%  | 12.3%                           | 24.8%                         |
| Bathing/showering                                                         | 5.6%                   | 17.6%                          | 40.4%                        | 14.0% | 42.3%                           | 67.3%                         |
| Eating                                                                    | 2.4%                   | 7.8%                           | 18.6%                        | 2.1%  | 6.5%                            | 12.0%                         |
| Getting in or out of bed                                                  | 4.8%                   | 15.1%                          | 33.9%                        | 7.2%  | 22.9%                           | 41.1%                         |
| Using the toilet                                                          | 4.6%                   | 14.3%                          | 30.6%                        | 4.0%  | 12.7%                           | 23.8%                         |
| Doing work around the house or garden                                     | 22.2%                  | 54.8%                          | 75.6%                        | 17.9% | 54.4%                           | 81.4%                         |
| <b>Instrumental activities of daily living (IADLs)</b>                    |                        |                                |                              |       |                                 |                               |
| Using a map to figure out how to get around in a strange place            | 10.0%                  | 24.4%                          | 37.8%                        | 6.0%  | 15.2%                           | 21.5%                         |
| Preparing a hot meal                                                      | 5.6%                   | 17.5%                          | 41.1%                        | 4.9%  | 15.8%                           | 30.7%                         |
| Shopping for groceries                                                    | 8.2%                   | 25.7%                          | 57.3%                        | 10.5% | 33.1%                           | 57.3%                         |
| Making telephone calls                                                    | 3.6%                   | 10.0%                          | 21.1%                        | 2.0%  | 5.6%                            | 9.1%                          |
| Taking medications                                                        | 2.9%                   | 8.2%                           | 18.1%                        | 1.7%  | 4.9%                            | 8.9%                          |
| Managing money                                                            | 5.0%                   | 14.2%                          | 29.0%                        | 2.7%  | 8.1%                            | 13.6%                         |
| <b>Mobility</b>                                                           |                        |                                |                              |       |                                 |                               |
| Walking 100 yards                                                         | 13.8%                  | 40.8%                          | 72.7%                        | 14.1% | 44.3%                           | 71.6%                         |
| Sitting for about 2 hours                                                 | 18.8%                  | 44.6%                          | 53.9%                        | 14.9% | 39.1%                           | 53.0%                         |
| Getting up from a chair after sitting for long periods                    | 38.6%                  | 79.4%                          | 90.1%                        | 28.6% | 69.5%                           | 83.7%                         |
| Climbing several flights of stairs without resting                        | 43.2%                  | 87.5%                          | 95.3%                        | 40.1% | 86.7%                           | 96.0%                         |
| Stooping, kneeling or crouching                                           | 44.2%                  | 87.1%                          | 94.6%                        | 38.9% | 84.5%                           | 94.1%                         |
| Reaching or extending your arms above shoulder level                      | 14.7%                  | 36.7%                          | 55.0%                        | 12.2% | 33.4%                           | 50.1%                         |
| Pulling or pushing large objects like a living room chair                 | 23.0%                  | 63.9%                          | 87.0%                        | 20.1% | 59.4%                           | 84.4%                         |
| Lifting or carrying weights above 10 pounds like a heavy bag of groceries | 20.0%                  | 58.2%                          | 84.9%                        | 28.8% | 75.2%                           | 90.7%                         |
| Picking up a 5p coin from a table                                         | 6.2%                   | 16.5%                          | 28.7%                        | 5.7%  | 16.1%                           | 26.9%                         |

Note: 'Moderate disability' is defined as reporting four or more limitations (out of 22). 'Severe disability' is defined using an alternative threshold of eight limitations. HRS and ELSA samples are defined in the text.

**Table A.2. Lifetime prevalence by quintile of equivalised household income: aged 55 and over, ELSA**

| Condition           | Quintile of equivalised income |                 |                 |                 |      |
|---------------------|--------------------------------|-----------------|-----------------|-----------------|------|
|                     | Bottom                         | 2 <sup>nd</sup> | 3 <sup>rd</sup> | 4 <sup>th</sup> | Top  |
| Hypertension        | 42.8                           | 41.9            | 43.6            | 40.5            | 35.5 |
| Heart attack        | 7.2                            | 8.1             | 7.5             | 5.8             | 5.1  |
| Stroke              | 5.4                            | 5.8             | 5.0             | 5.1             | 3.6  |
| Diabetes            | 8.2                            | 9.6             | 9.3             | 7.8             | 6.9  |
| Lung disease        | 8.3                            | 6.1             | 7.1             | 7.0             | 4.4  |
| Cancer              | 6.2                            | 7.3             | 6.9             | 7.4             | 7.4  |
| Moderate disability | 34.5                           | 34.2            | 32.4            | 26.5            | 17.1 |
| Severe disability   | 14.9                           | 16.9            | 15.0            | 12.7            | 6.7  |

Note: Income quintiles are defined within age group (as below) then pooled. 'Moderate disability' is defined as reporting four or more limitations (out of 22). 'Severe disability' is defined using an alternative threshold of eight limitations. Unweighted ELSA sample is defined in the text.

**Table A.3. Lifetime prevalence by quintile of equivalised household income: aged 55–69, ELSA**

| Condition           | Quintile of equivalised income |                 |                 |                 |      |
|---------------------|--------------------------------|-----------------|-----------------|-----------------|------|
|                     | Bottom                         | 2 <sup>nd</sup> | 3 <sup>rd</sup> | 4 <sup>th</sup> | Top  |
| Hypertension        | 39.3                           | 38.7            | 40.7            | 33.9            | 30.7 |
| Heart attack        | 6.9                            | 6.9             | 5.3             | 2.9             | 2.5  |
| Stroke              | 3.9                            | 4.9             | 3.3             | 2.4             | 1.5  |
| Diabetes            | 7.4                            | 8.8             | 7.9             | 5.5             | 4.8  |
| Lung disease        | 8.9                            | 5.8             | 5.9             | 4.6             | 3.2  |
| Cancer              | 5.9                            | 6.0             | 6.8             | 6.9             | 5.1  |
| Moderate disability | 31.0                           | 32.5            | 25.1            | 16.6            | 9.5  |
| Severe disability   | 15.2                           | 17.7            | 11.6            | 6.5             | 3.6  |

Note: Income quintiles are defined within the age group. 'Moderate disability' is defined as reporting four or more limitations (out of 22). 'Severe disability' is defined using an alternative threshold of eight limitations. Unweighted ELSA sample is defined in the text.

**Table A.4. Lifetime prevalence by quintile of equivalised household income: aged 70–84, ELSA**

| Condition                 | Quintile of equivalised income |                 |                 |                 |      |
|---------------------------|--------------------------------|-----------------|-----------------|-----------------|------|
|                           | Bottom                         | 2 <sup>nd</sup> | 3 <sup>rd</sup> | 4 <sup>th</sup> | Top  |
| Hypertension              | 48.7                           | 47.2            | 48.5            | 51.6            | 43.5 |
| Heart attack <sup>a</sup> | 7.8                            | 10.1            | 11.2            | 10.6            | 9.5  |
| Stroke                    | 7.9                            | 7.2             | 7.8             | 9.5             | 7.2  |
| Diabetes                  | 9.5                            | 10.9            | 11.7            | 11.7            | 10.5 |
| Lung disease              | 7.2                            | 6.6             | 9.0             | 11.0            | 6.4  |
| Cancer                    | 6.6                            | 9.5             | 7.2             | 8.2             | 11.2 |
| Moderate disability       | 40.2                           | 37.0            | 44.6            | 43.1            | 30.0 |
| Severe disability         | 14.4                           | 15.6            | 20.8            | 23.2            | 11.9 |

Note: Income quintiles are defined within the age group. 'Moderate disability' is defined as reporting four or more limitations (out of 22). 'Severe disability' is defined using an alternative threshold of eight limitations. Unweighted ELSA sample is defined in the text.

Appendix B: Full results

Table B.1. Prevalence model results: ELSA

|                | Cancer             | Diabetes          | Lung disease      | Heart attack      | Stroke            | Moderate disability (4+) | Severe disability (8+) |
|----------------|--------------------|-------------------|-------------------|-------------------|-------------------|--------------------------|------------------------|
| Male           | -4.58***<br>(1.10) | 1.59<br>(1.19)    | 0.12<br>(1.07)    | 3.76***<br>(1.07) | 1.23<br>(0.93)    | -5.74***<br>(1.90)       | -0.63<br>(1.44)        |
| 60 to 69       | 0.01<br>(0.97)     | 0.78<br>(1.05)    | 0.23<br>(0.94)    | 1.65*<br>(0.94)   | 2.12***<br>(0.82) | 3.65**<br>(1.67)         | 1.36<br>(1.27)         |
| 70 to 79       | 0.38<br>(1.04)     | 4.79***<br>(1.12) | 1.97*<br>(1.00)   | 5.45***<br>(1.01) | 4.41***<br>(0.88) | 17.05***<br>(1.79)       | 6.06***<br>(1.36)      |
| 80 to 84       | 0.38<br>(1.43)     | 1.75<br>(1.54)    | -0.88<br>(1.38)   | 4.33***<br>(1.38) | 9.60***<br>(1.20) | 26.47***<br>(2.47)       | 14.27***<br>(1.87)     |
| 60 to 69, male | 3.00**<br>(1.42)   | 1.81<br>(1.53)    | 1.39<br>(1.37)    | 2.34*<br>(1.37)   | 0.26<br>(1.19)    | 1.45<br>(2.43)           | -0.16<br>(1.85)        |
| 70 to 79, male | 5.96***<br>(1.51)  | 1.46<br>(1.64)    | 1.62<br>(1.46)    | 3.09**<br>(1.47)  | 0.67<br>(1.27)    | -7.37***<br>(2.60)       | -5.33***<br>(1.98)     |
| 80 to 84, male | 5.53**<br>(2.20)   | 3.26<br>(2.37)    | 3.49*<br>(2.12)   | 2.45<br>(2.13)    | 0.25<br>(1.85)    | -3.28<br>(3.80)          | -4.33<br>(2.89)        |
| Low education  | -0.54<br>(0.56)    | 1.13*<br>(0.60)   | 3.44***<br>(0.54) | 2.33***<br>(0.54) | 2.27***<br>(0.47) | 12.29***<br>(0.96)       | 9.01***<br>(0.73)      |
| Single         | 0.36<br>(0.62)     | 0.41<br>(0.67)    | 2.56***<br>(0.60) | 0.42<br>(0.60)    | 0.29<br>(0.53)    | 6.06***<br>(1.07)        | 3.93***<br>(0.82)      |
| Constant       | 7.68***<br>(0.81)  | 4.39***<br>(0.88) | 2.58***<br>(0.78) | 0.06<br>(0.79)    | -0.06<br>(0.68)   | 14.69***<br>(1.40)       | 4.44***<br>(1.06)      |
| $R^2$          | 0.00               | 0.01              | 0.01              | 0.03              | 0.02              | 0.07                     | 0.04                   |
| $N$            | 8,724              | 8,725             | 8,715             | 8,723             | 8,725             | 8,628                    | 8,628                  |

Standard errors are in parentheses. \*  $p < 0.1$ ; \*\*  $p < 0.05$ ; \*\*\*  $p < 0.01$ . ELSA sample is defined in the text.

**Table B.2. Prevalence model results: HRS**

|                | Cancer             | Diabetes          | Lung disease      | Stroke            | Moderate disability (4+) | Severe disability (8+) |
|----------------|--------------------|-------------------|-------------------|-------------------|--------------------------|------------------------|
| Male           | -4.79***<br>(1.68) | 3.53**<br>(1.73)  | -2.44<br>(1.49)   | 0.64<br>(1.17)    | -8.46***<br>(2.13)       | -2.32<br>(1.44)        |
| 60 to 69       | 3.38***<br>(1.26)  | 2.08<br>(1.30)    | 1.66<br>(1.12)    | 0.52<br>(0.87)    | 1.52<br>(1.59)           | 0.22<br>(1.08)         |
| 70 to 79       | 5.87***<br>(1.33)  | 3.71***<br>(1.37) | -0.16<br>(1.18)   | 3.62***<br>(0.92) | 9.79***<br>(1.68)        | 3.10***<br>(1.14)      |
| 80 to 84       | 8.23***<br>(1.69)  | 3.67**<br>(1.74)  | -0.77<br>(1.50)   | 4.73***<br>(1.17) | 19.28***<br>(2.13)       | 8.82***<br>(1.45)      |
| 60 to 69, male | 2.46<br>(1.95)     | 1.50<br>(2.01)    | 1.91<br>(1.73)    | 0.20<br>(1.35)    | 1.11<br>(2.46)           | -1.03<br>(1.67)        |
| 70 to 79, male | 7.36***<br>(2.05)  | 3.62*<br>(2.11)   | 6.95***<br>(1.82) | 2.87**<br>(1.42)  | -1.41<br>(2.59)          | -0.11<br>(1.76)        |
| 80 to 84, male | 13.23***<br>(2.65) | 1.01<br>(2.72)    | 5.17**<br>(2.35)  | 2.77<br>(1.83)    | -1.24<br>(3.35)          | -2.50<br>(2.27)        |
| Low education  | -2.27***<br>(0.66) | 3.82***<br>(0.68) | 4.69***<br>(0.58) | 1.97***<br>(0.45) | 12.30***<br>(0.83)       | 5.50***<br>(0.56)      |
| Single         | 0.67<br>(0.75)     | 2.28***<br>(0.77) | 5.61***<br>(0.67) | 1.09**<br>(0.52)  | 7.73***<br>(0.95)        | 4.97***<br>(0.64)      |
| Constant       | 11.86***<br>(1.11) | 8.17***<br>(1.15) | 5.88***<br>(0.99) | 2.31***<br>(0.77) | 19.28***<br>(1.41)       | 5.31***<br>(0.96)      |
| $R^2$          | 0.02               | 0.01              | 0.02              | 0.01              | 0.06                     | 0.03                   |
| $N$            | 12,076             | 12,076            | 12,076            | 12,068            | 12,077                   | 12,077                 |

Standard errors are in parentheses. \*  $p < 0.1$ ; \*\*  $p < 0.05$ ; \*\*\*  $p < 0.01$ . HRS sample is defined in the text.

**Table B.3. Survival model results**

| Dependent variable is four-year survival | ELSA<br>Basic<br>(1) | ELSA<br>+ priors,<br>behaviours and<br>work<br>(2) | ELSA<br>+ co-morbidity<br>and interactions<br>(3) | HRS<br>Basic<br>(1) | HRS<br>+ priors,<br>behaviours and<br>work<br>(2) | HRS<br>+ co-morbidity<br>and interactions<br>(3) |
|------------------------------------------|----------------------|----------------------------------------------------|---------------------------------------------------|---------------------|---------------------------------------------------|--------------------------------------------------|
| Male                                     | -2.21*<br>(1.17)     | -2.59**<br>(1.14)                                  | -2.51**<br>(1.14)                                 | -3.78***<br>(1.38)  | -5.71***<br>(1.35)                                | -5.55***<br>(1.34)                               |
| 60 to 69                                 | -0.74<br>(1.03)      | -0.00<br>(1.04)                                    | 0.05<br>(1.04)                                    | -1.12<br>(1.04)     | -0.25<br>(1.02)                                   | -0.46<br>(1.01)                                  |
| 70 to 79                                 | -7.01***<br>(1.11)   | -4.26***<br>(1.16)                                 | -3.73***<br>(1.16)                                | -8.43***<br>(1.09)  | -5.81***<br>(1.11)                                | -4.48***<br>(1.11)                               |
| 80 to 84                                 | -15.40***<br>(1.49)  | -10.70***<br>(1.55)                                | -9.16***<br>(1.58)                                | -19.06***<br>(1.37) | -14.03***<br>(1.41)                               | -10.33***<br>(1.44)                              |
| 60 to 69, male                           | -0.33<br>(1.49)      | 0.15<br>(1.45)                                     | -0.02<br>(1.45)                                   | -0.35<br>(1.60)     | -0.08<br>(1.55)                                   | -0.08<br>(1.54)                                  |
| 70 to 79, male                           | -3.63**<br>(1.59)    | -3.68**<br>(1.56)                                  | -3.67**<br>(1.56)                                 | -1.29<br>(1.68)     | -0.44<br>(1.63)                                   | -0.55<br>(1.62)                                  |
| 80 to 84, male                           | -10.65***<br>(2.31)  | -10.19***<br>(2.26)                                | -9.71***<br>(2.25)                                | -3.95*<br>(2.16)    | -3.40<br>(2.11)                                   | -3.36<br>(2.10)                                  |
| Low education                            | -2.05***<br>(0.61)   | -0.97<br>(0.60)                                    | -1.00*<br>(0.60)                                  | -0.87<br>(0.57)     | 0.34<br>(0.56)                                    | 0.37<br>(0.55)                                   |
| Bottom household income<br>tercile       | -3.50***<br>(0.80)   | 0.15<br>(0.80)                                     | 0.06<br>(0.80)                                    | -6.57***<br>(0.71)  | -2.03***<br>(0.73)                                | -2.22***<br>(0.73)                               |
| Middle household income<br>tercile       | -1.53**<br>(0.75)    | 0.16<br>(0.74)                                     | 0.11<br>(0.74)                                    | -2.31***<br>(0.67)  | -0.32<br>(0.66)                                   | -0.48<br>(0.66)                                  |
| Prior diagnosis of cancer                |                      | -9.07***<br>(1.10)                                 | -7.41***<br>(1.18)                                |                     | -5.04***<br>(0.72)                                | -3.68***<br>(0.81)                               |
| Prior diagnosis of diabetes              |                      | -2.41**<br>(1.04)                                  | -0.46<br>(1.16)                                   |                     | -6.18***<br>(0.73)                                | -5.02***<br>(0.84)                               |
| Prior diagnosis of lung<br>disease       |                      | -7.36***<br>(1.16)                                 | -5.37***<br>(1.32)                                |                     | -4.76***<br>(0.84)                                | -3.76***<br>(0.96)                               |
| Prior diagnosis of heart<br>attack       |                      | -2.38**<br>(1.16)                                  | -0.36<br>(1.27)                                   |                     |                                                   |                                                  |
| Prior diagnosis of stroke                |                      | -5.74***<br>(1.33)                                 | -3.38**<br>(1.44)                                 |                     | -8.28***<br>(1.06)                                | -6.07***<br>(1.15)                               |
| Moderate disability prior                |                      | -4.39***<br>(0.70)                                 | -2.93***<br>(0.80)                                |                     | -7.80***<br>(0.62)                                | -6.43***<br>(0.74)                               |
| Single                                   |                      | -2.28***<br>(0.65)                                 | -2.24***<br>(0.65)                                |                     | -1.91***<br>(0.61)                                | -1.75***<br>(0.60)                               |
| Overweight or obese                      |                      | 1.44**<br>(0.67)                                   | 1.29*<br>(0.66)                                   |                     | 3.89***<br>(0.56)                                 | 3.80***<br>(0.56)                                |

|                                 |                     |                     |                     |                     |                     |                     |
|---------------------------------|---------------------|---------------------|---------------------|---------------------|---------------------|---------------------|
| Morbidly obese                  |                     | 0.77<br>(1.25)      | 0.56<br>(1.25)      |                     | 7.22***<br>(1.10)   | 6.50***<br>(1.10)   |
| Current smoker                  |                     | -4.00***<br>(0.84)  | -4.10***<br>(0.84)  |                     | -3.10***<br>(0.80)  | -3.39***<br>(0.80)  |
| Ex-regular smoker               |                     | -2.31***<br>(0.64)  | -2.26***<br>(0.64)  |                     | -1.44**<br>(0.58)   | -1.48**<br>(0.58)   |
| Vigorous exercise < once a week |                     | -2.01***<br>(0.67)  | -2.04***<br>(0.67)  |                     | 3.81***<br>(0.54)   | 3.76***<br>(0.54)   |
| Never drinks                    |                     | -1.90**<br>(0.89)   | -1.91**<br>(0.89)   |                     | -2.23***<br>(0.57)  | -2.33***<br>(0.57)  |
| Not in work                     |                     | -1.27<br>(0.79)     | -1.52*<br>(0.79)    |                     | -2.24***<br>(0.62)  | -2.46***<br>(0.62)  |
| Co-morbid                       |                     |                     | -2.64*<br>(1.51)    |                     |                     | 1.23<br>(1.25)      |
| 75 and over * Co-morbid         |                     |                     | -8.75***<br>(1.68)  |                     |                     | -15.17***<br>(1.29) |
| Constant                        | 100.05***<br>(0.91) | 103.94***<br>(1.11) | 103.67***<br>(1.11) | 100.71***<br>(0.93) | 102.38***<br>(1.13) | 101.85***<br>(1.13) |
| $R^2$                           | 0.06                | 0.11                | 0.12                | 0.07                | 0.13                | 0.14                |
| $N$                             | 8,735               | 8,712               | 8,712               | 12,077              | 12,065              | 12,065              |

Standard errors are in parentheses. \*  $p < 0.1$ ; \*\*  $p < 0.05$ ; \*\*\*  $p < 0.01$ . ELSA and HRS samples are defined in the text. No heart attack onset available in HRS.

**Table B.4. Survival model results: ELSA sample splits**

| Dependent variable is four-year survival | Men                 | Women               | Low education       | High education     | Young (55-69)      | Old (70-84)        | Couple              | Single             |
|------------------------------------------|---------------------|---------------------|---------------------|--------------------|--------------------|--------------------|---------------------|--------------------|
| Male                                     |                     |                     | -3.50**<br>(1.75)   | -1.15<br>(1.43)    | -2.20***<br>(0.85) | -7.36***<br>(1.51) | -1.09<br>(1.16)     | -7.62**<br>(2.99)  |
| 60 to 69                                 | 0.78<br>(1.23)      | -0.81<br>(1.00)     | -0.04<br>(1.53)     | 0.26<br>(1.35)     | -0.07<br>(0.77)    |                    | 0.26<br>(1.09)      | -1.43<br>(2.42)    |
| 70 to 79                                 | -5.69***<br>(1.47)  | -5.64***<br>(1.17)  | -4.13**<br>(1.68)   | -3.61**<br>(1.55)  |                    |                    | -2.22*<br>(1.31)    | -6.84***<br>(2.47) |
| 80 to 84                                 | -15.69***<br>(2.17) | -11.94***<br>(1.58) | -9.86***<br>(2.24)  | -8.62***<br>(2.17) |                    | -4.12**<br>(1.92)  | -12.23***<br>(2.41) | -9.55***<br>(2.82) |
| 60 to 69, male                           |                     |                     | 0.14<br>(2.15)      | -0.29<br>(1.90)    | 0.06<br>(1.08)     |                    | -1.74<br>(1.49)     | 8.01**<br>(3.72)   |
| 70 to 79, male                           |                     |                     | -3.09<br>(2.26)     | -3.77*<br>(2.11)   |                    |                    | -4.15**<br>(1.69)   | -2.66<br>(3.70)    |
| 80 to 84, male                           |                     |                     | -13.02***<br>(3.17) | -3.71<br>(3.16)    |                    | -5.86**<br>(2.91)  | -5.99**<br>(3.02)   | -8.00*<br>(4.45)   |
| Low education                            | -1.48<br>(0.96)     | -0.41<br>(0.75)     |                     |                    | -0.04<br>(0.56)    | -2.58**<br>(1.31)  | -0.54<br>(0.66)     | -1.48<br>(1.26)    |
| Bottom household income<br>tercile       | -0.18<br>(1.28)     | 0.38<br>(1.00)      | 0.09<br>(1.20)      | -0.66<br>(1.08)    | -0.68<br>(0.75)    | 1.02<br>(1.82)     | -0.47<br>(0.88)     | -0.34<br>(1.69)    |
| Middle household income<br>tercile       | 0.65<br>(1.15)      | -0.25<br>(0.95)     | -0.28<br>(1.17)     | 0.23<br>(0.92)     | -0.36<br>(0.65)    | 0.84<br>(1.84)     | 1.04<br>(0.78)      | -3.15*<br>(1.72)   |
| Prior diagnosis of cancer                | -11.97***<br>(1.96) | -4.42***<br>(1.44)  | -10.21***<br>(1.70) | -3.80**<br>(1.57)  | -7.28***<br>(1.16) | -7.35***<br>(2.39) | -6.74***<br>(1.31)  | -8.78***<br>(2.41) |
| Prior diagnosis of diabetes              | -0.81<br>(1.68)     | -0.86<br>(1.59)     | -0.82<br>(1.59)     | 0.04<br>(1.65)     | 0.28<br>(1.17)     | -1.73<br>(2.25)    | 0.23<br>(1.27)      | -0.85<br>(2.40)    |
| Prior diagnosis of lung disease          | -8.07***<br>(2.03)  | -2.77<br>(1.71)     | -5.60***<br>(1.71)  | -5.24**<br>(2.11)  | -3.75***<br>(1.31) | -6.89***<br>(2.60) | -6.49***<br>(1.50)  | -3.38<br>(2.57)    |
| Prior diagnosis of heart attack          | 0.09<br>(1.74)      | -0.27<br>(1.96)     | -0.03<br>(1.69)     | -0.70<br>(1.94)    | -2.75**<br>(1.37)  | 1.52<br>(2.33)     | -0.81<br>(1.40)     | 0.97<br>(2.62)     |
| Prior diagnosis of stroke                | -6.06**<br>(2.13)   | -1.71<br>(1.97)     | -5.00***<br>(1.85)  | -0.26<br>(2.38)    | -3.86**<br>(1.62)  | -3.03<br>(2.56)    | -6.16***<br>(1.66)  | 0.24<br>(2.79)     |
| Moderate disability prior                | -4.66***<br>(1.44)  | -1.81*<br>(0.93)    | -3.73***<br>(1.08)  | -1.44<br>(1.18)    | -1.80**<br>(0.80)  | -4.57***<br>(1.59) | -2.44***<br>(0.91)  | -3.69**<br>(1.57)  |
| Single                                   | -3.42***<br>(1.11)  | -1.59**<br>(0.77)   | -2.44***<br>(0.90)  | -1.28<br>(0.92)    | -0.64<br>(0.63)    | -4.26***<br>(1.31) |                     |                    |
| Overweight or obese                      | 1.32<br>(1.10)      | 1.07<br>(0.81)      | 1.68*<br>(0.97)     | 0.59<br>(0.88)     | 0.39<br>(0.62)     | 2.75*<br>(1.43)    | 1.07<br>(0.74)      | 1.85<br>(1.36)     |
| Morbidly obese                           | -2.71               | 1.67                | 1.00                | -0.55              | -1.24              | 4.72               | -1.62               | 4.15*              |

|                                 |           |           |           |           |           |           |           |           |
|---------------------------------|-----------|-----------|-----------|-----------|-----------|-----------|-----------|-----------|
|                                 | (2.42)    | (1.40)    | (1.70)    | (1.82)    | (1.10)    | (3.06)    | (1.42)    | (2.42)    |
| Current smoker                  | -4.54***  | -3.65***  | -3.62***  | -5.44***  | -2.79***  | -7.70***  | -3.71***  | -5.06***  |
|                                 | (1.40)    | (1.02)    | (1.13)    | (1.26)    | (0.74)    | (2.08)    | (0.95)    | (1.66)    |
| Ex-regular smoker               | -2.26**   | -2.26***  | -2.29**   | -2.13**   | -1.90***  | -2.53*    | -1.66**   | -3.46**   |
|                                 | (1.02)    | (0.81)    | (0.93)    | (0.85)    | (0.61)    | (1.36)    | (0.69)    | (1.37)    |
| Vigorous exercise < once a week | -2.76***  | -1.12     | -1.49     | -2.52***  | -1.57***  | -3.22*    | -1.61**   | -3.04**   |
|                                 | (1.03)    | (0.87)    | (1.01)    | (0.86)    | (0.59)    | (1.67)    | (0.71)    | (1.52)    |
| Never drinks                    | 2.20      | -4.51***  | -2.48**   | -0.89     | -1.22     | -2.64     | -0.88     | -3.79**   |
|                                 | (1.66)    | (1.01)    | (1.17)    | (1.37)    | (0.90)    | (1.71)    | (1.05)    | (1.62)    |
| Not in work                     | -2.66**   | 0.18      | -1.29     | -1.93*    | -1.23*    | -4.71     | -1.33     | -1.59     |
|                                 | (1.21)    | (1.02)    | (1.18)    | (1.01)    | (0.63)    | (3.01)    | (0.81)    | (1.93)    |
| Co-morbid                       | -2.02     | -2.25     | -0.98     | -6.41***  | -5.18***  | 1.33      | -3.94**   | -0.55     |
|                                 | (2.37)    | (1.95)    | (1.99)    | (2.33)    | (1.44)    | (3.20)    | (1.68)    | (3.06)    |
| 75 and over * Co-morbid         | -12.55*** | -5.43**   | -11.67*** | -1.40     |           | -10.59*** | -11.04*** | -6.68**   |
|                                 | (2.60)    | (2.17)    | (2.18)    | (2.68)    |           | (2.79)    | (2.09)    | (2.98)    |
| Constant                        | 102.82*** | 101.59*** | 103.34*** | 102.87*** | 102.51*** | 105.38*** | 101.96*** | 106.22*** |
|                                 | (1.57)    | (1.22)    | (1.75)    | (1.36)    | (0.91)    | (3.54)    | (1.15)    | (2.62)    |
| $R^2$                           | 0.15      | 0.09      | 0.14      | 0.09      | 0.06      | 0.11      | 0.12      | 0.13      |
| $N$                             | 3,995     | 4,717     | 4,974     | 3,738     | 5,463     | 3,249     | 5,987     | 2,725     |

Standard errors are in parentheses. \*  $p < 0.1$ ; \*\*  $p < 0.05$ ; \*\*\*  $p < 0.01$ . ELSA sample is defined in the text.



**Table B.5. Survival model results: HRS sample splits**

| Dependent variable is four-year survival | Men                 | Women               | Low education       | High education     | Young (55-69)      | Old (70-84)         | Couple             | Single              |
|------------------------------------------|---------------------|---------------------|---------------------|--------------------|--------------------|---------------------|--------------------|---------------------|
| Male                                     |                     |                     | -6.74***<br>(2.13)  | -4.12**<br>(1.68)  | -4.85***<br>(1.02) | -10.35***<br>(2.14) | -4.85***<br>(1.37) | -7.67**<br>(3.80)   |
| 60 to 69                                 | -0.06<br>(1.31)     | -0.90<br>(0.95)     | -0.75<br>(1.48)     | -0.54<br>(1.37)    | -0.84<br>(0.77)    |                     | 0.12<br>(1.08)     | -3.03<br>(2.41)     |
| 70 to 79                                 | -4.14***<br>(1.47)  | -5.31***<br>(1.09)  | -5.61***<br>(1.61)  | -3.32**<br>(1.54)  |                    | 5.18***<br>(1.55)   | -3.96***<br>(1.23) | -7.03***<br>(2.53)  |
| 80 to 84                                 | -12.46***<br>(1.99) | -11.53***<br>(1.44) | -13.42***<br>(1.99) | -5.07**<br>(2.14)  |                    |                     | -6.64***<br>(1.97) | -14.15***<br>(2.83) |
| 60 to 69, male                           |                     |                     | 0.51<br>(2.37)      | -0.31<br>(1.99)    | -0.04<br>(1.16)    |                     | -0.46<br>(1.59)    | 1.05<br>(4.27)      |
| 70 to 79, male                           |                     |                     | 0.03<br>(2.46)      | -1.21<br>(2.14)    |                    | 3.21<br>(2.33)      | -0.11<br>(1.71)    | -3.01<br>(4.37)     |
| 80 to 84, male                           |                     |                     | -0.34<br>(3.04)     | -9.18***<br>(2.95) |                    |                     | -7.93***<br>(2.53) | 1.73<br>(5.02)      |
| Low education                            | 0.65<br>(0.89)      | 0.18<br>(0.69)      |                     |                    | 0.92*<br>(0.54)    | -0.32<br>(1.10)     | 0.33<br>(0.61)     | 0.51<br>(1.22)      |
| Bottom household income tercile          | -1.84<br>(1.18)     | -2.37***<br>(0.91)  | -2.06*<br>(1.05)    | -2.15**<br>(1.03)  | -1.37*<br>(0.72)   | -3.60**<br>(1.45)   | -2.61***<br>(0.80) | -1.67<br>(1.63)     |
| Middle household income tercile          | -1.13<br>(1.05)     | 0.17<br>(0.84)      | -0.44<br>(1.01)     | -0.67<br>(0.87)    | -0.91<br>(0.62)    | -0.91<br>(1.40)     | -0.72<br>(0.70)    | -0.11<br>(1.60)     |
| Prior diagnosis of cancer                | -3.78***<br>(1.32)  | -3.67***<br>(1.01)  | -4.53***<br>(1.16)  | -3.07***<br>(1.12) | -4.02***<br>(0.85) | -4.01***<br>(1.47)  | -3.72***<br>(0.90) | -3.74**<br>(1.70)   |
| Prior diagnosis of diabetes              | -5.70***<br>(1.27)  | -4.26***<br>(1.11)  | -5.29***<br>(1.14)  | -4.69***<br>(1.23) | -2.86***<br>(0.86) | -7.69***<br>(1.56)  | -3.81***<br>(0.92) | -7.72***<br>(1.80)  |
| Prior diagnosis of lung disease          | -5.61***<br>(1.56)  | -2.05*<br>(1.20)    | -3.28**<br>(1.27)   | -4.62***<br>(1.49) | -1.34<br>(0.99)    | -6.30***<br>(1.80)  | -3.87***<br>(1.11) | -3.99**<br>(1.90)   |
| Prior diagnosis of stroke                | -5.96***<br>(1.80)  | -5.99***<br>(1.48)  | -6.28***<br>(1.51)  | -5.52***<br>(1.81) | -5.83***<br>(1.32) | -6.35***<br>(1.94)  | -7.00***<br>(1.31) | -4.36*<br>(2.32)    |
| Moderate disability prior                | -8.54***<br>(1.33)  | -5.23***<br>(0.86)  | -7.01***<br>(0.98)  | -5.48***<br>(1.14) | -3.29***<br>(0.76) | -9.89***<br>(1.38)  | -5.38***<br>(0.84) | -8.81***<br>(1.51)  |
| Single                                   | -2.40**<br>(1.13)   | -1.36*<br>(0.69)    | -1.52*<br>(0.83)    | -2.16**<br>(0.89)  | -1.27**<br>(0.62)  | -2.42**<br>(1.12)   |                    |                     |
| Overweight or obese                      | 5.40***<br>(0.94)   | 2.48***<br>(0.68)   | 5.74***<br>(0.79)   | 1.34*<br>(0.78)    | 1.91***<br>(0.57)  | 5.70***<br>(1.05)   | 4.00***<br>(0.62)  | 3.40***<br>(1.18)   |
| Morbidly obese                           | 7.96***<br>(1.89)   | 5.14***<br>(1.31)   | 8.44***<br>(1.47)   | 4.16**<br>(1.66)   | 2.48**<br>(1.00)   | 12.80***<br>(2.54)  | 6.69***<br>(1.21)  | 6.00**<br>(2.35)    |
| Current smoker                           | -4.63***            | -2.37**             | -2.55**             | -4.87***           | -2.71***           | -7.21***            | -3.72***           | -2.91*              |

|                                 |           |           |           |           |           |           |           |           |
|---------------------------------|-----------|-----------|-----------|-----------|-----------|-----------|-----------|-----------|
|                                 | (1.26)    | (1.02)    | (1.07)    | (1.23)    | (0.72)    | (1.88)    | (0.91)    | (1.61)    |
| Ex-regular smoker               | -2.33**   | -1.08     | -1.78**   | -1.10     | -0.77     | -2.12*    | -1.28**   | -2.11*    |
|                                 | (0.98)    | (0.70)    | (0.82)    | (0.79)    | (0.57)    | (1.12)    | (0.63)    | (1.27)    |
| Vigorous exercise < once a week | 4.66***   | 2.81***   | 4.19***   | 3.07***   | 1.63***   | 6.58***   | 3.82***   | 3.59***   |
|                                 | (0.87)    | (0.68)    | (0.77)    | (0.75)    | (0.52)    | (1.08)    | (0.59)    | (1.21)    |
| Never drinks                    | -2.68***  | -1.98***  | -1.78**   | -2.99***  | -1.49***  | -3.48***  | -1.72***  | -3.97***  |
|                                 | (0.87)    | (0.75)    | (0.84)    | (0.76)    | (0.55)    | (1.16)    | (0.61)    | (1.32)    |
| Not in work                     | -3.48***  | -1.21     | -2.17**   | -2.89***  | -2.59***  | -3.43**   | -2.34***  | -2.48*    |
|                                 | (0.97)    | (0.80)    | (0.90)    | (0.84)    | (0.55)    | (1.49)    | (0.67)    | (1.45)    |
| Co-morbid                       | 2.05      | 0.50      | 0.74      | 1.91      | -1.71     | 1.74      | -0.31     | 4.56*     |
|                                 | (2.09)    | (1.54)    | (1.68)    | (1.89)    | (1.22)    | (2.56)    | (1.40)    | (2.61)    |
| 75 and over * Co-morbid         | -14.25*** | -15.69*** | -14.24*** | -15.60*** |           | -11.05*** | -13.29*** | -17.42*** |
|                                 | (2.13)    | (1.58)    | (1.67)    | (2.07)    |           | (2.14)    | (1.57)    | (2.38)    |
| Constant                        | 96.43***  | 101.31*** | 101.48*** | 102.88*** | 101.92*** | 95.23***  | 100.35*** | 105.04*** |
|                                 | (1.70)    | (1.22)    | (1.77)    | (1.44)    | (0.96)    | (2.49)    | (1.19)    | (2.77)    |
| $R^2$                           | 0.14      | 0.14      | 0.15      | 0.12      | 0.06      | 0.14      | 0.13      | 0.14      |
| $N$                             | 5,345     | 6,720     | 6,863     | 5,152     | 7,036     | 5,029     | 8,579     | 3,479     |

Standard errors are in parentheses. \*  $p < 0.1$ ; \*\*  $p < 0.05$ ; \*\*\*  $p < 0.01$ . HRS sample is defined in the text.
